# Supplementary material for: Generation and characterization of monodisperse deformable alginate and pNIPAM microparticles with a wide range of shear moduli
Source: Royal Society of Chemistry journal article supplement (doi:10.1039/c7sm01079f), 2017-01-01
Supplement: c7sm01079f3.pdf [file c7sm01079f3.pdf]

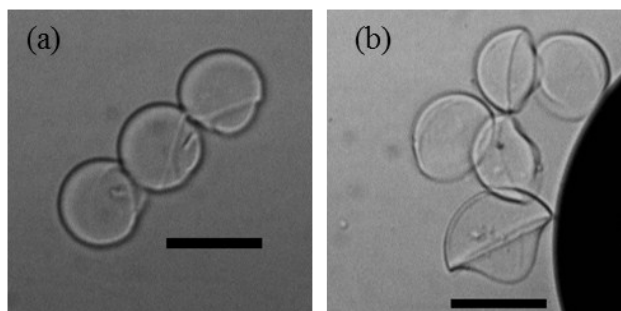

SI Fig. 1. 1 wt% alginate particles gelled in a 10 wt% calcium chloride bath with the exit tubing (a) at the interface ( $h \sim 0$  mm) and (b) 8 mm below the interface ( $h = -8$  mm).
